# Supplementary material for: Remote Sensing of Marine Phytoplankton Sizes and Groups Based on the Generalized Addictive Model (GAM)
Source: MDPI journal article supplement (doi:10.3390/rs14133037), 2022-06-24
Supplement: s1 [file s1]

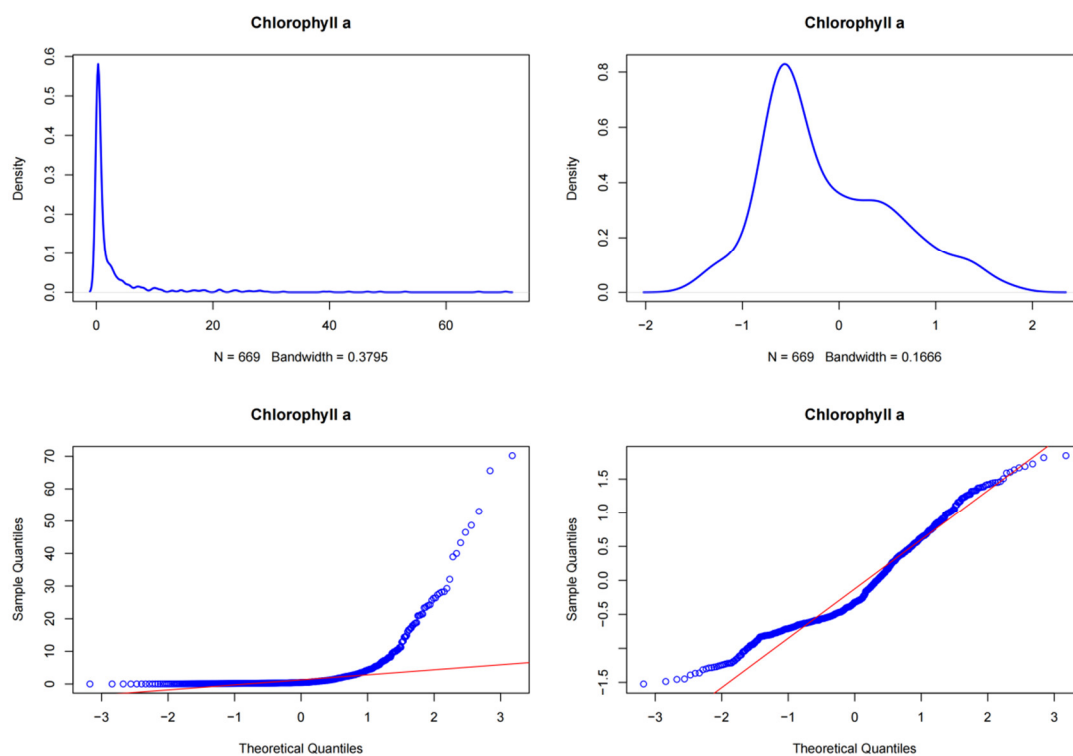

Figure S1. Q - Q plots of Chlorophyll a.

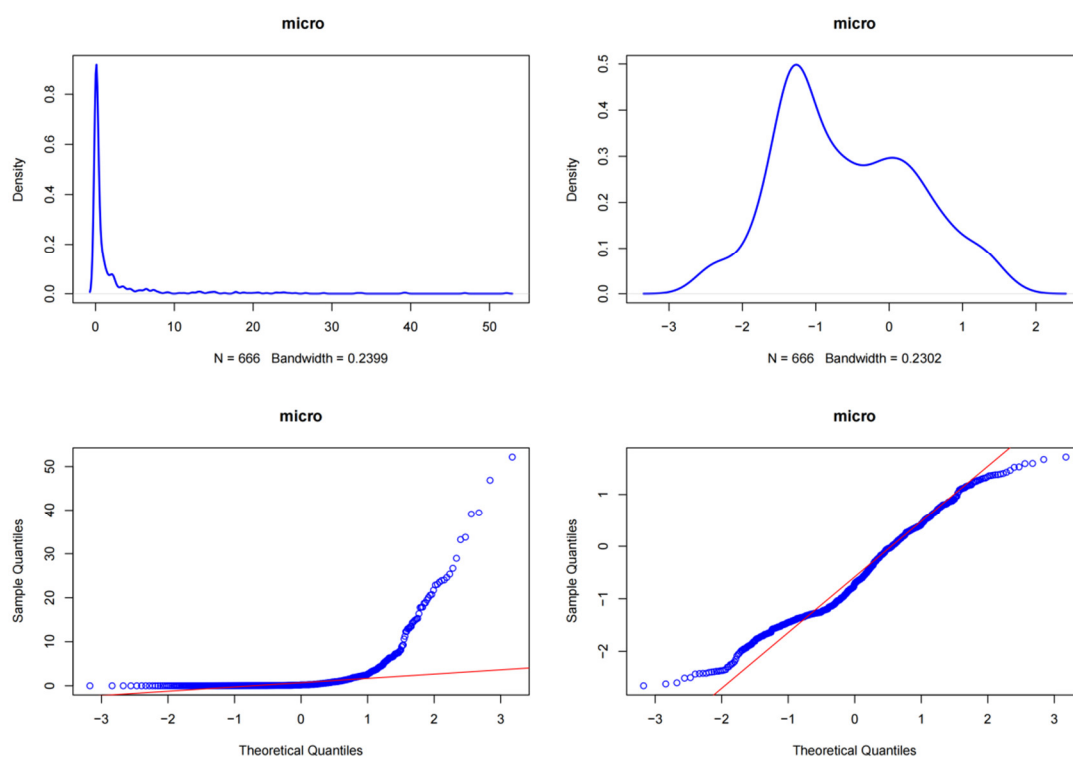

Figure S2. Q - Q plots of Micro-phytoplankton.

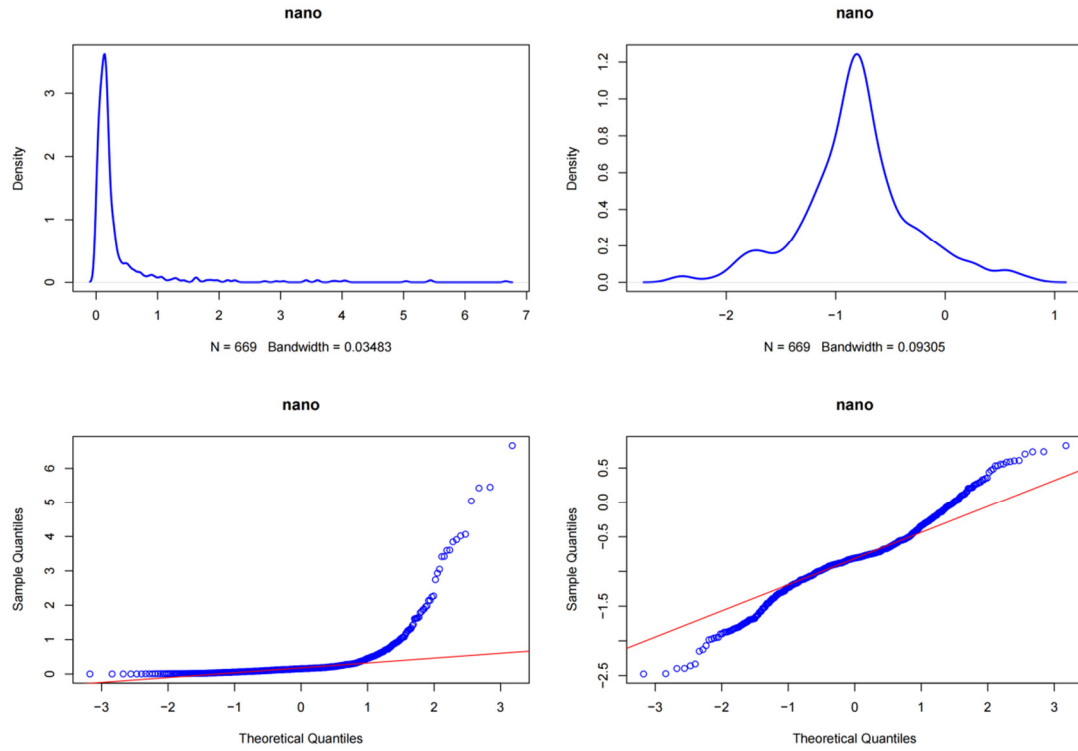

**Figure S3.** Q - Q plots of Nano-phytoplankton.

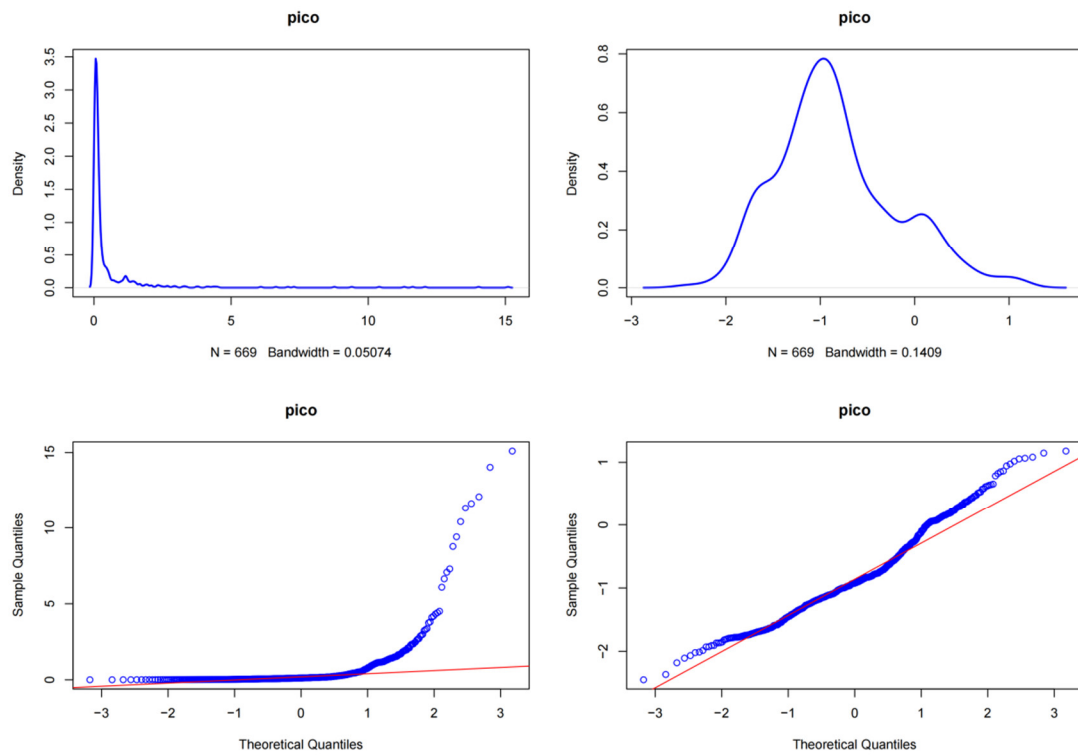

**Figure S4.** Q - Q plots of Pico-phytoplankton.

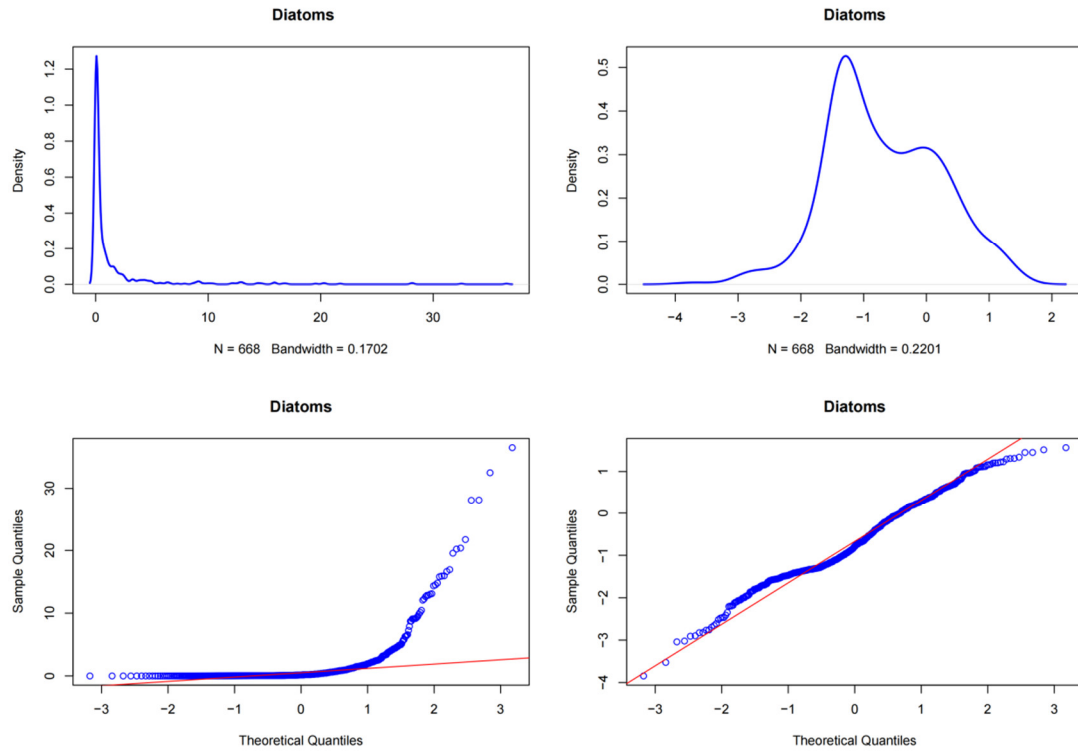

Figure S5. Q - Q plots of Diatoms.

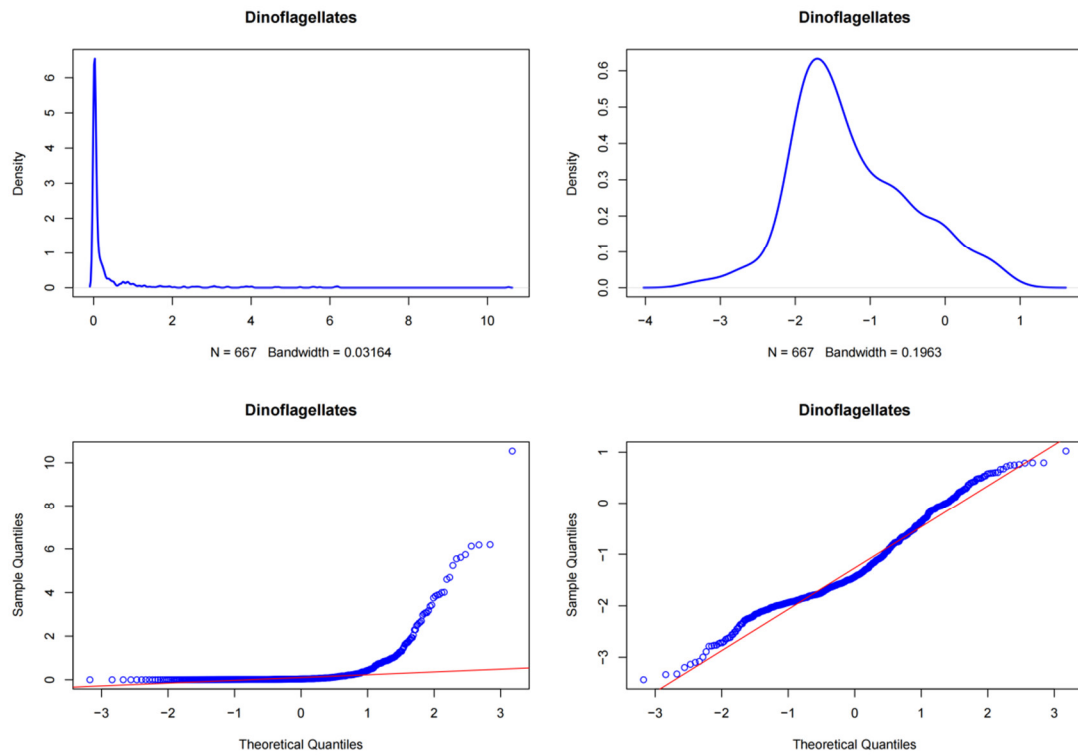

Figure S6. Q - Q plots of Dinoflagellates.

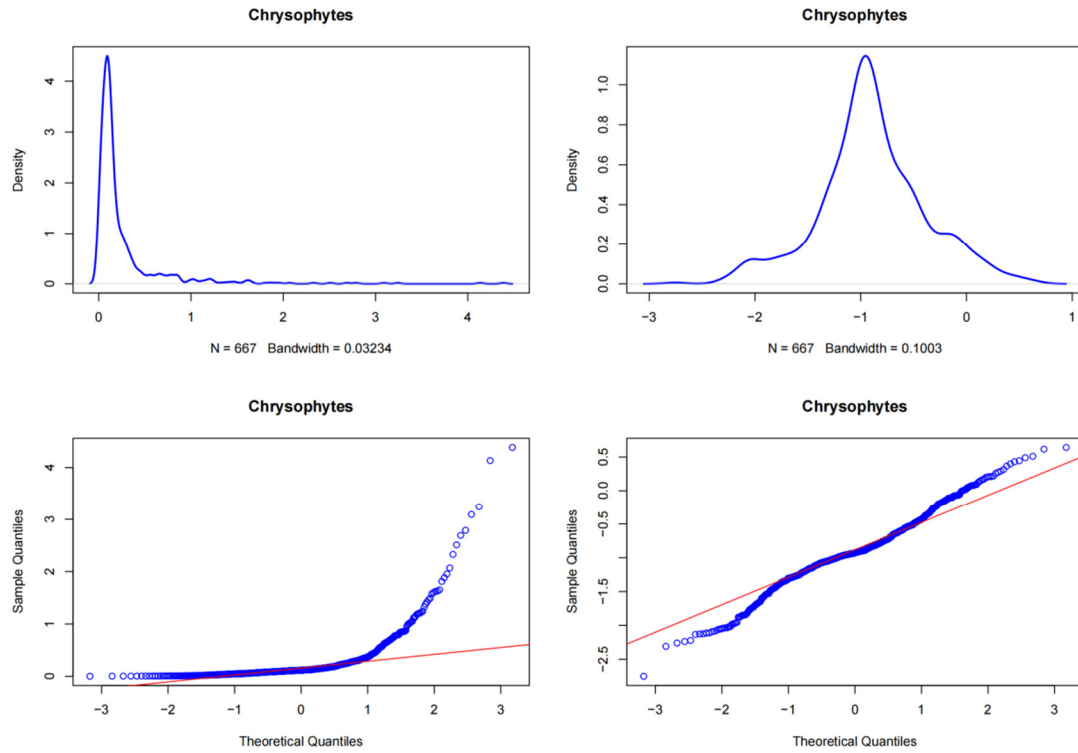

Figure S7. Q - Q plots of Chrysophytes.

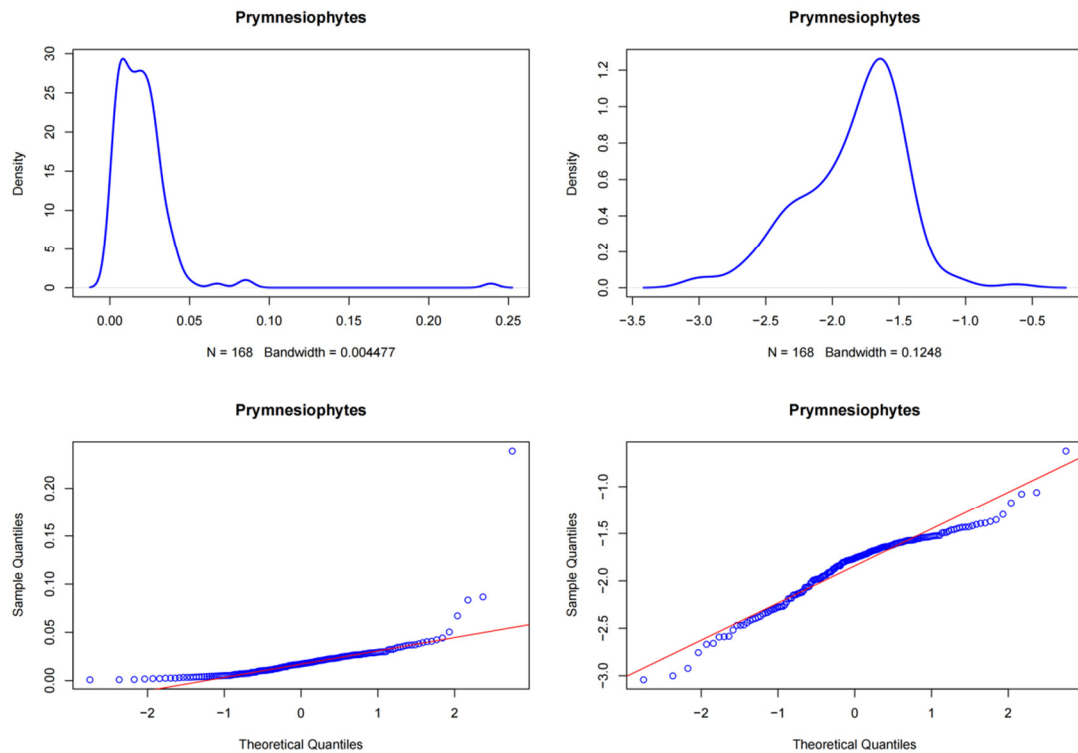

Figure S8. Q - Q plots of Prymnesiophytes.

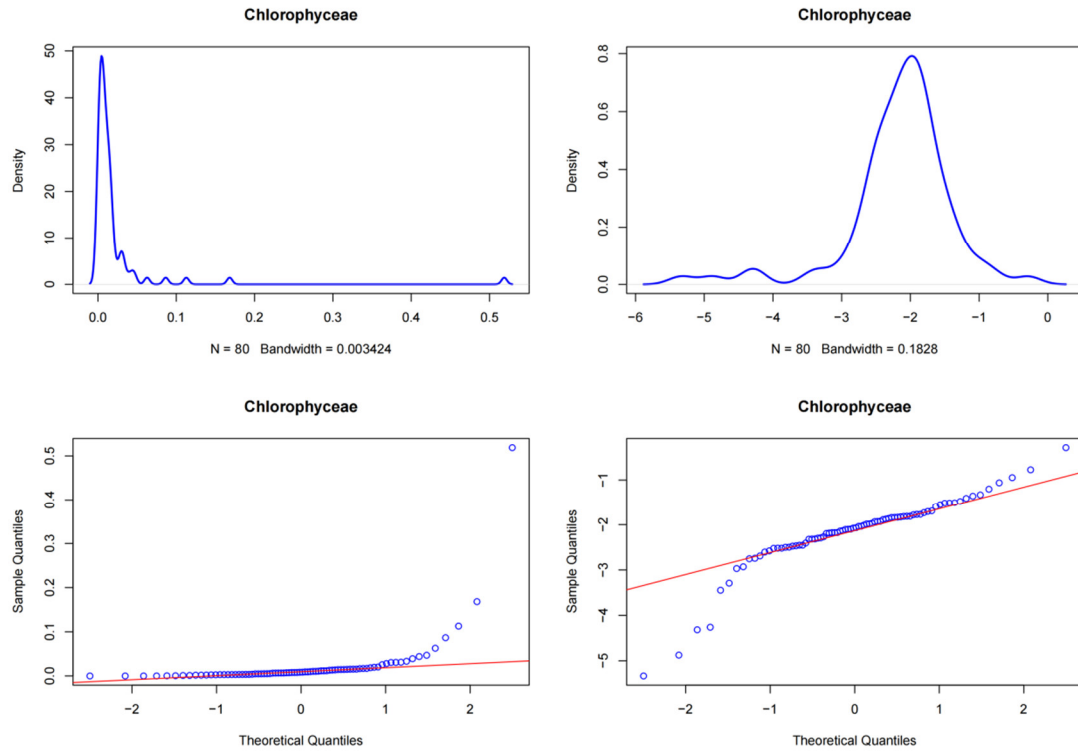

Figure S9. Q - Q plots of Chlorophyceae.

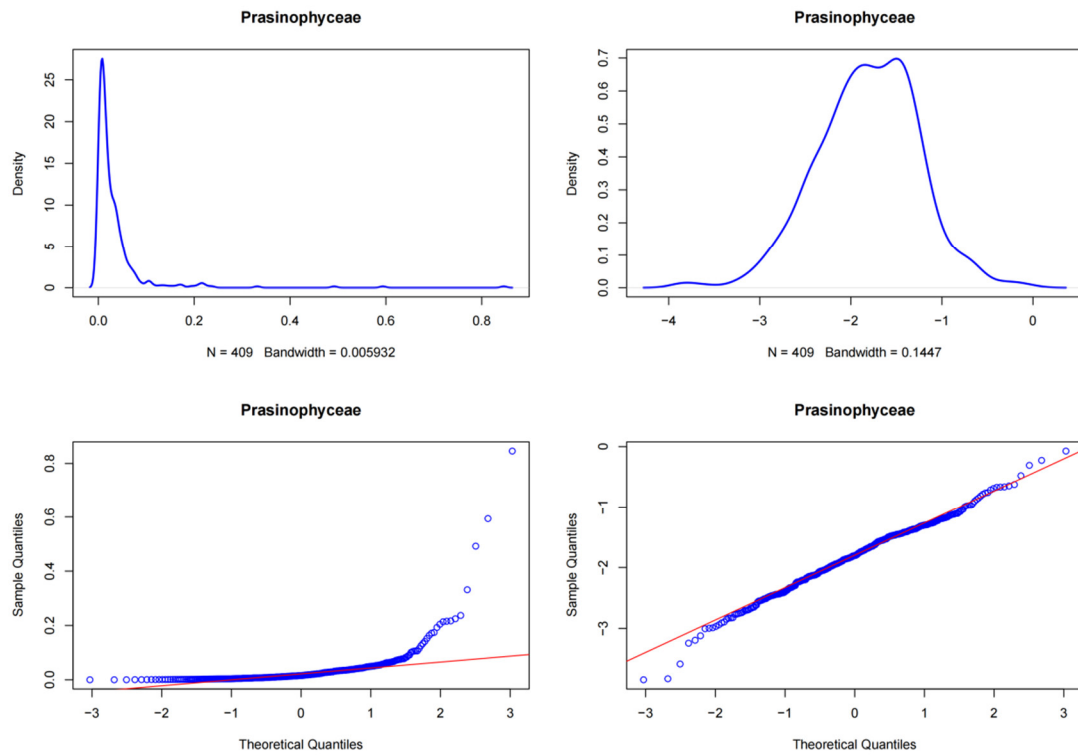

Figure S10. Q - Q plots of Prasinophyceae.

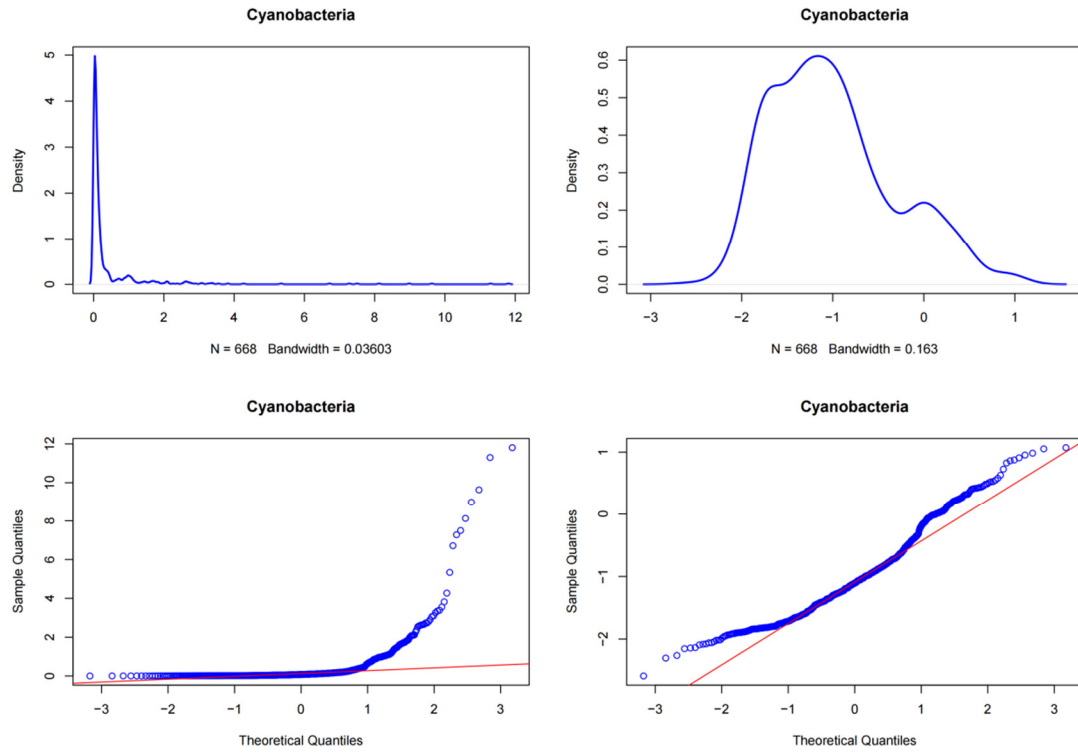

Figure S11. Q - Q plots of Cyanobacteria.

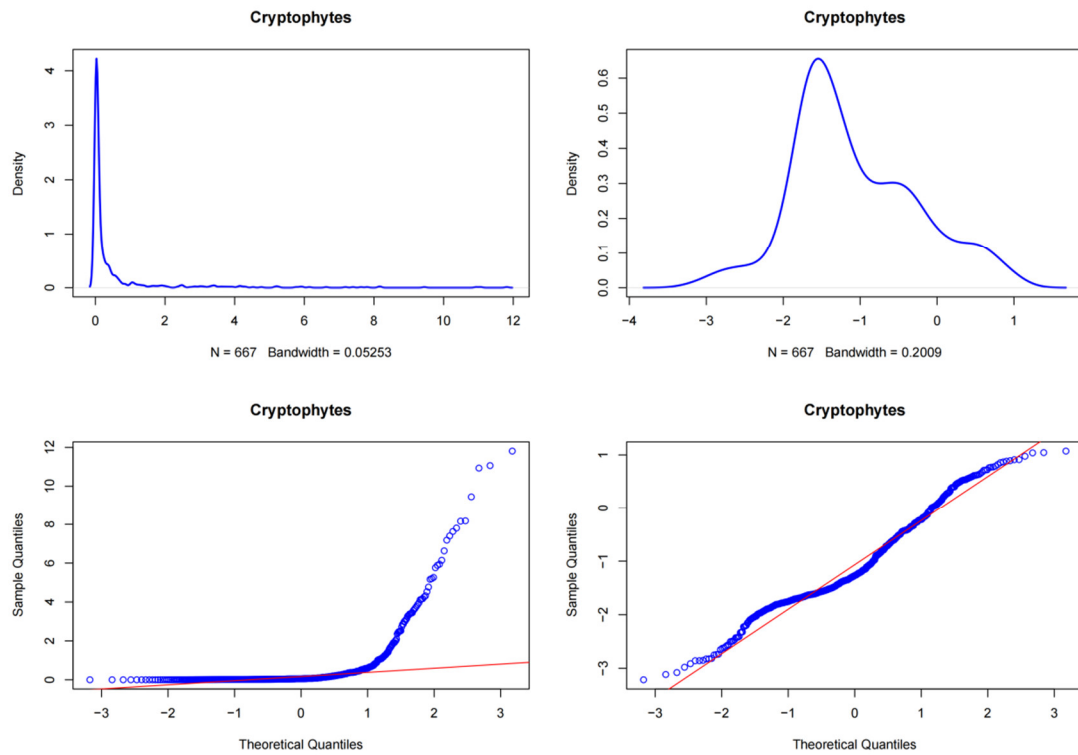

Figure S12. Q - Q plots of Cryptophytes.
